# Supplementary material for: A near-infrared photodetector based on carbon nanotube transistors exhibits ultra-low dark current through field-modulated charge carrier transport
Source: Royal Society of Chemistry journal article supplement (doi:10.1039/d3cp01497e), 2023-01-01
Supplement: d3cp01497e1.pdf [file d3cp01497e1.pdf]

## Supplementary Information

### **A near-infrared photodetector based on carbon nanotube transistors exhibits ultra-low dark current through field-modulated charge carrier transport**

Sheng Wang<sup>#,1,2</sup>, Wuhua Huang<sup>#,1,4</sup>, Junlong Tian<sup>\*,1,3</sup>, Jie Peng,<sup>1</sup> Juexian Cao<sup>\*,1,2</sup>

<sup>1</sup> Hunan Key Laboratory of Micro-Nano Energy Materials and Devices, Laboratory for Quantum Engineering and Micro-Nano Energy Technology, School of Physics and Optoelectronic, Xiangtan University, Xiangtan, Hunan 411105, China.

<sup>2</sup> Hunan Institute of Advanced Sensing and Information Technology, Xiangtan 411105, China

<sup>3</sup> Department of Electronic Science, College of Big Data and Information Engineering, Guizhou University, Guiyang 550025, China

<sup>4</sup> Guangxi Zhuang Autonomous Region Institute of Metrology & Test, 530200, China

<sup>#</sup> These authors contributed equally to this work.

<sup>\*</sup>Address correspondence to E-mail: [jltian169@163.com](mailto:jltian169@163.com), [jxcao@xtu.edu.cn](mailto:jxcao@xtu.edu.cn)

Contents:

Figure S1. Dark current of QD heterojunction photodetectors

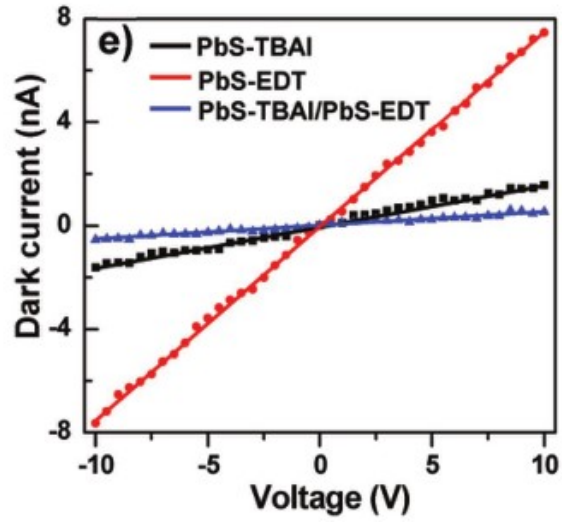

Figure S1. Dark current of QD heterojunction photodetectors.
